# Supplementary material for: MicroRNA-19b Plays a Key Role in 5-Fluorouracil Resistance and Predicts Tumor Progression in Locally Advanced Rectal Cancer Patients
Source: Int J Mol Sci. 2022 Oct 18;23(20):12447. doi: 10.3390/ijms232012447 (PMC9604503; doi:10.3390/ijms232012447)
Supplement: Supplementary file 1 [file ijms-23-12447-s001.zip › ijms-1947072-supplementary.pdf]

# MicroRNA-19b plays a key role in 5-fluorouracil resistance and predicts tumor progression in locally advanced rectal cancer patients

Andrea Santos <sup>1, 2,§</sup>, Ion Cristóbal <sup>1,2,§,\*</sup>, Jaime Rubio <sup>1,3</sup>, Cristina Caramés <sup>1,3</sup>, Melani Luque <sup>4</sup>, Marta Sanz-Alvarez <sup>4</sup>, Sandra Zazo <sup>4</sup>, Juan Madoz-Gúrpide <sup>4</sup>, Federico Rojo <sup>4</sup> and Jesús García-Foncillas <sup>2,3,\*</sup>

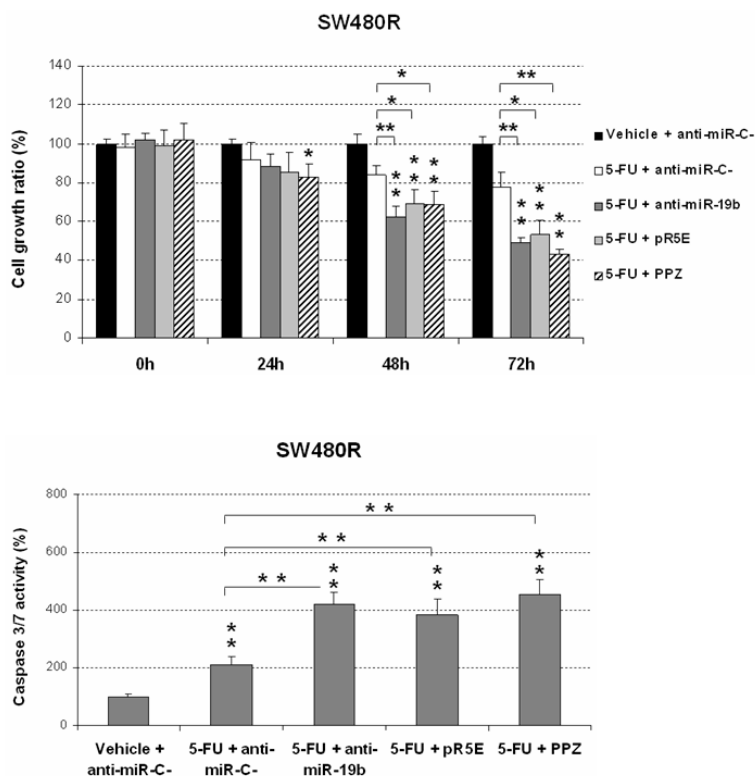

**Figure S1.** MTS and caspase-activation assays showing that the miR-19b/PPP2R5E signaling axis emerges as a novel therapeutic target to overcome 5-FU resistance; \*P < 0.05; \*\*P < 0.01. Asterisks over the columns refer comparison of each condition against control (first column).

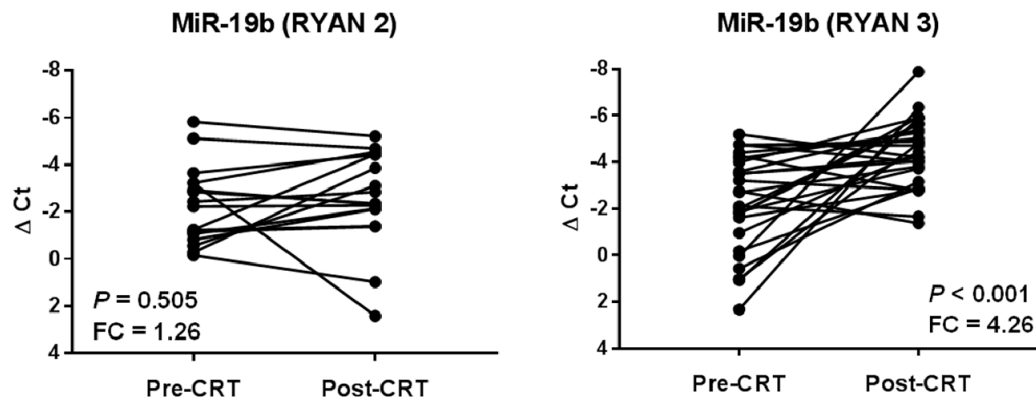

**Figure S2.** Scatter plots showing miR-19b expression in pre- and post-preoperative CRT samples from each LARC patient of our global cohort. FC = fold change.

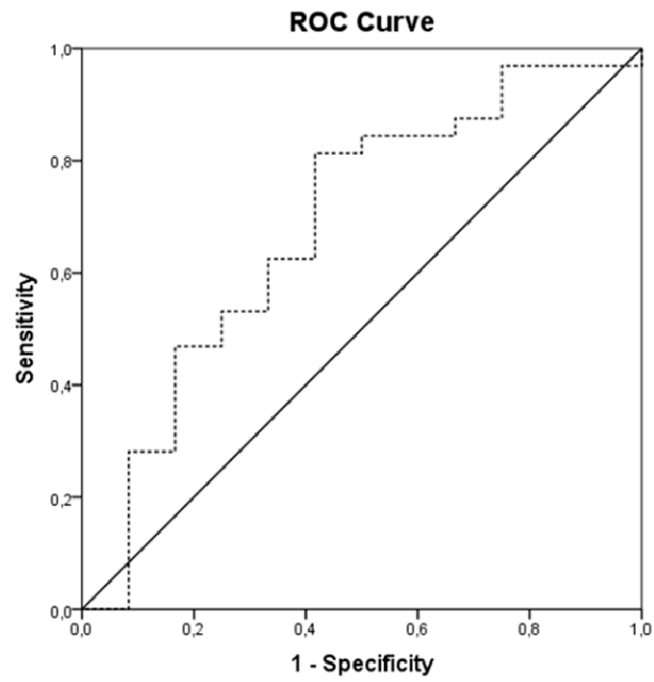

**Figure S3.** Receiver operating characteristic (ROC) curve to assess the usefulness of miR-19b to discriminate patient recurrence in post-treatment samples from LARC patients that have a lack of response to neoadjuvant CRT. The dashed line represents the coordinated points of the ROC curve. The solid line is the diagonal reference line.

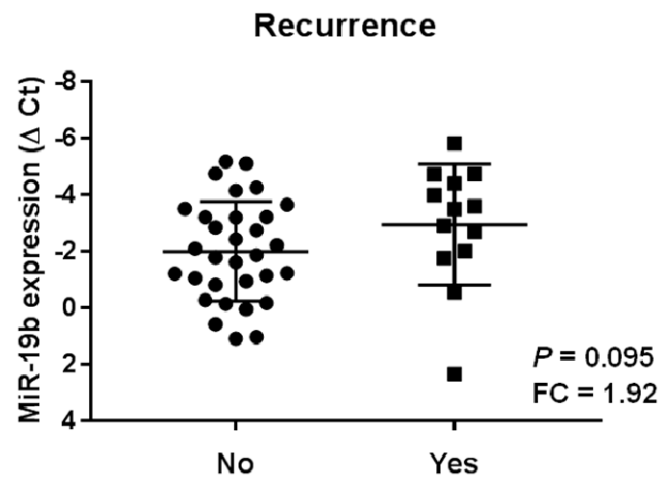

**Figure S4.** MiR-19b expression levels in pre-CRT samples from LARC patients with and without disease relapse in our global cohort. FC = fold change.

**Table S1.** Clinical characteristics of a series of 44 LARC patients with paired pre- and post-neoadjuvant CRT biopsies available.

|                                     |               | No. (%)   |
|-------------------------------------|---------------|-----------|
| Sex                                 |               |           |
|                                     | Male          | 28 (63.6) |
|                                     | Female        | 16 (36.4) |
| Age                                 |               |           |
|                                     | <70           | 27 (61.4) |
|                                     | ≥70           | 17 (38.6) |
| ECOG <sup>1</sup>                   |               |           |
|                                     | 0             | 29 (65.9) |
|                                     | ≥1            | 15 (34.1) |
| Site of primary tumor               |               |           |
|                                     | Rectum        | 44 (100)  |
| Clinical stage pre-CRT <sup>2</sup> |               |           |
|                                     | II            | 3 (6.8)   |
|                                     | III           | 41 (93.2) |
| Grade pre-CRT                       |               |           |
|                                     | Low           | 18 (40.9) |
|                                     | Moderate-High | 26 (59.1) |
| Pathological response               |               |           |
|                                     | RYAN 2        | 17 (38.6) |
|                                     | RYAN 3        | 27 (61.4) |

<sup>1</sup>ECOG = Eastern Cooperative Oncology Group; <sup>2</sup>CRT = Chemoradiotherapy; RYAN 2 = residual cancer outgrown by fibrosis; RYAN 3 = minimal or no tumor kill and extensive residual cancer.

**Table S2.** Association between local and distant recurrence and miR-19b expression in post-treatment biopsies from non-responder LARC patients to neoadjuvant CRT.

| Parameter              | No. Cases | No (%)    | Yes (%)  | <i>p</i>     |
|------------------------|-----------|-----------|----------|--------------|
| MiR-19b overexpression | 44        | 30        | 14       |              |
| Local recurrence       | 44        | 30        | 14       | <b>0.004</b> |
| No                     | 38        | 29 (76.3) | 9 (23.7) |              |
| Yes                    | 6         | 1 (16.7)  | 5 (83.3) |              |
| Distant metastasis     | 44        | 30        | 14       | <b>0.009</b> |
| No                     | 33        | 26 (78.8) | 7 (21.2) |              |
| Yes                    | 11        | 4 (36.4)  | 7 (63.6) |              |
